# Supplementary material for: OPDAylation of Thiols of the Redox Regulatory Network In Vitro
Source: MDPI journal article supplement (doi:10.3390/antiox11050855), 2022-04-27
Supplement: s1 [file s1]

**Supplementary Table S1: Primers used for molecular cloning of coding sequences of genes**

| Gene                                                                                                                                                                                                                                                                                                                                  | AGI       | Vector        | Restriction enzyme |         | Primer Sequence 5'->3'                         |
|---------------------------------------------------------------------------------------------------------------------------------------------------------------------------------------------------------------------------------------------------------------------------------------------------------------------------------------|-----------|---------------|--------------------|---------|------------------------------------------------|
| TRXf1 <sup>1</sup>                                                                                                                                                                                                                                                                                                                    | At3g02730 | pET15b        | NdeI               | Forward | AAAACATATGAGCTTAGAAACCGTTAATGTC                |
|                                                                                                                                                                                                                                                                                                                                       |           |               | BamHI              | Reverse | TTTTGGATCCTCATCCGGAAGCAGCAGACCTC               |
| TRXm4 <sup>1</sup>                                                                                                                                                                                                                                                                                                                    | At3g15360 | pET15b        | NdeI               | Forward | AAAACATATGGAGGCTCAGGACACCACTG                  |
|                                                                                                                                                                                                                                                                                                                                       |           |               | BamHI              | Reverse | TTTTGGATCCTTACTCGACCAAGAATCTTTCTATAG           |
| TRXh3                                                                                                                                                                                                                                                                                                                                 | At5g42980 | pET28a        | NdeI               | Forward | AAAACATATGGCCGCAGAAGGAGAAGTTATC                |
|                                                                                                                                                                                                                                                                                                                                       |           |               | BamHI              | Reverse | TTTTGGATCCTCAAGCAGCAGCAACAACGTCTTG             |
| TRXh5                                                                                                                                                                                                                                                                                                                                 | At1g45145 | pET28a        | NdeI               | Forward | AAAACATATGGCCGGTGAAGGAGAA                      |
|                                                                                                                                                                                                                                                                                                                                       |           |               | XhoI               | Reverse | TTTTCTCGAGTCAAGCAGAAGCTACAAGAC                 |
| GRXC2                                                                                                                                                                                                                                                                                                                                 | AT5G40370 | pET28a        | NheI               | Forward | AAAAGCTAGCATGGCGATGCAGAAAGCTAAG                |
|                                                                                                                                                                                                                                                                                                                                       |           |               | BamHI              | Reverse | TTTTGGATCCTTAAGCAGAAGTTGTTGCAGTCTTTC           |
| GRXC5                                                                                                                                                                                                                                                                                                                                 | AT4G28730 | pEXP5-NT/TOPO | TOPO Cloning       | Forward | ACTTCTTCTTCTCGGCTGCATC                         |
|                                                                                                                                                                                                                                                                                                                                       |           |               |                    | Reverse | AACTCTGACCGTTTTTACCGTTG                        |
| GPXL8                                                                                                                                                                                                                                                                                                                                 | At1g63460 | pET28a        | NdeI               | Forward | AAAACATATGGCGACGAAGGAACCAAG                    |
|                                                                                                                                                                                                                                                                                                                                       |           |               | XhoI               | Reverse | TTTTCTCGAGTCAGGAGATATTCAGAAGATTCTTTATGTC       |
| NTRA                                                                                                                                                                                                                                                                                                                                  | At2g17420 | pET28a        | NdeI               | Forward | AAAACATATGTCCTCCGCCGCCGCCGCT                   |
|                                                                                                                                                                                                                                                                                                                                       |           |               | BamHI              | Reverse | TTTTGGATCCTCAATCACTCTTACCCTCCTGAGATCCAATCTCTTG |
| PRXIIB                                                                                                                                                                                                                                                                                                                                | At1g65980 | pET28a        | NdeI               | Forward | AAAACATATGGCTCCAATTGCTGTCGGCGATG               |
|                                                                                                                                                                                                                                                                                                                                       |           |               | BamHI              | Reverse | TTTTGGATCCTTAGAGAGCCTTGAGGATATCATCGGCGCTG      |
| GR                                                                                                                                                                                                                                                                                                                                    | At3g24170 | pET28a        | NheI               | Forward | AAAAGCTAGCATGGCGAGGAAGATGCTTG                  |
|                                                                                                                                                                                                                                                                                                                                       |           |               | BamHI              | Reverse | TTTTGGATCCTCATAGATTGTCTTAGGTTTGGGTTTGTG        |
| PGK3                                                                                                                                                                                                                                                                                                                                  | AT1G79550 | pET28a        | NdeI               | Forward | AAAACATATGGCGACGAAGAGAAGCGTTG                  |
|                                                                                                                                                                                                                                                                                                                                       |           |               | XhoI               | Reverse | TTTTCTCGAGTCAAGCTTCGTCGAGAGCGAG                |
| GAPC2 <sup>2</sup>                                                                                                                                                                                                                                                                                                                    | At1g13440 | pET16b        | NdeI               | Forward | GCGCGCCATATGGCTGACAAGAAGATTAG                  |
|                                                                                                                                                                                                                                                                                                                                       |           |               | BamHI              | Reverse | GCGCGCGGATAATTAGGCCTTTGACATGTG                 |
|                                                                                                                                                                                                                                                                                                                                       |           |               |                    |         |                                                |
| <sup>1</sup> Dreyer, A., Schackmann, A., Kriznik, A., Chibani, K., Wesemann, C., Vogelsang, L., Beyer, A. & Dietz, K. J. (2020). Thiol redox regulation of plant β-carbonic anhydrase. <i>Biomolecules</i> , 10(8), 1125. Reference [17] in main manuscript                                                                           |           |               |                    |         |                                                |
| <sup>2</sup> Holtgrefe, S., Gohlke, J., Starmann, J., Druce, S., Klocke, S., Altmann, B., Wojtera, J., Lindermayr, C. & Scheibe, R. (2008). Regulation of plant cytosolic glyceraldehyde 3-phosphate dehydrogenase isoforms by thiol modifications. <i>Physiologia Plantarum</i> , 133(2), 211-228. Reference [18] in main manuscript |           |               |                    |         |                                                |

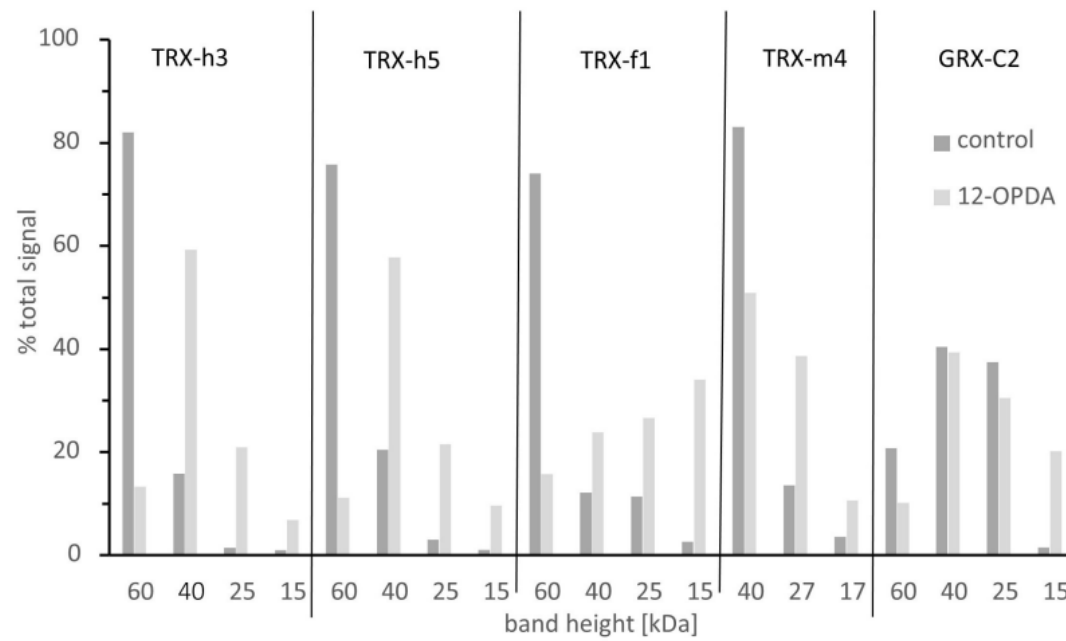

**Supplementary Figure S1: Quantification of band intensities of gel presented as Figure 1.** Total intensity of all bands in one lane as determined with the image analysis software Image J was set to 100% and percentage of the individual bands calculated as share of total.
